# Supplementary material for: Constitutive activation and oncogenicity are mediated by loss of helical structure at the cytosolic boundary of thrombopoietin receptor mutant dimers
Source: eLife. 2023 Jun 20;12:e81521. doi: 10.7554/eLife.81521 (PMC10313314; doi:10.7554/eLife.81521)
Supplement: Figure 1—source data 1. — STAT5 transcriptional activity of the murine thrombopoietin receptor (mTpoR) wild type (WT) or mutant assessed in HEK-293T cells by luciferase assay with STAT5 reporter Spi-Luc. [file elife-81521-fig1-data1.xlsx]

## Sheet: Figure 1c
	Figure 1 – Source Data 1: Raw data, scatter plot and statistics (Prism 9.1.2, jmp pro12) for Figure 1c (upper panel). STAT5 transcriptional activity of the murine thrombopoietin receptor (mTpoR) wild type (WT) or mutant assessed in HEK-293T cells by luciferase assay with STAT5 reporter Spi-Luc.
	Normalized results on mTpoR WT of luciferase ratio as relative luciferase units (rlu)
	PIGeV	mTpoR WT	L491N	L492N	L493N	V494N	L495N	S496N	L497N	S498N	A499N	L500N	L501N	G502N
Biological triplicate 1 - technical triplicate	0.789	1.07	0.825	0.819	1.09	1.21	1.08	0.777	1.17	1.49	0.727	0.488	1.04	1.28
	0.879	0.904	0.899	0.705	0.859	1.09	1.02	0.844	1.17	1.35	0.769	0.513	0.988	1.26
	0.812	1.03	0.787	0.678	0.848	1.01	0.93	0.94	1.17	1.62	0.824	0.539	1.01	1.22
Biological triplicate 2 - technical triplicate	1.37	0.984	0.844	0.996	0.836	1.43	1.32	0.617	0.732	1.65	1.23	0.674	0.869	1.61
	1.41	0.997	0.69	0.871	0.87	1.31	1.16	0.544	0.632	1.54	1.18	0.736	0.754	1.68
	1.39	1.02	0.831	0.94	0.768	1.28	1.19	0.618	0.728	1.57	1.2	0.66	0.71	1.57
Biological triplicate 3 - technical triplicate	0.817	1	1.55	1.13	1.22	1.31	0.87	1.16	0.99	1.87	1.46	1.19	1.42	2.61
	0.923	0.993	1.32	1.06	1.06	1.37	0.916	1.7	1.17	1.71	1.42	1.18	1.47	2.56
	0.878	1.01	1.4	1.3	0.967	1.18	0.889	1.43	1.1	1.85	1.49	1.41	1.56	2.58
Biological triplicate 4 - technical triplicate	0.521	0.969	0.441	0.501	0.802	0.954	0.715	0.595	0.815	1.18	0.935	0.881	1.17
	0.493	1.02	0.337	0.585	0.803	0.983	0.751	0.643	0.869	1.11	1.02	0.687	1.12
	0.553	1.01	0.426	0.586	0.808	0.934	0.708	0.62	0.805	1.17	0.898	0.69	1.3
non-parametric multiple comparison Steel's test with mTpoR WT as control; p:		/	0.1297			0.1466				0.0001				0.0006
Biological replicates	4
Technical replicates	3x4
Kruskal-Wallis test																Figure 1c: scatter plot, mean with SEM
P value	<0,0001
Exact or approximate P value?	Approximate
P value summary	****
Do the medians vary signif. (P < 0.05)?	Yes
Number of groups	5
Kruskal-Wallis statistic	32.25
Data summary
Number of treatments (columns)	5
Number of values (total)	57
