# Supplementary material for: Constitutive activation and oncogenicity are mediated by loss of helical structure at the cytosolic boundary of thrombopoietin receptor mutant dimers
Source: eLife. 2023 Jun 20;12:e81521. doi: 10.7554/eLife.81521 (PMC10313314; doi:10.7554/eLife.81521)
Supplement: Figure 1—source data 2. — Short-term cell growth measured using the Cell-Titer-Glo luminescent cell viability assay with stable Ba/F3 cell lines expressing the murine thrombopoietin receptor (mTpoR) WT or mutant with no ligand or increasing concentrations of Tpo ligand (0.1–100 ng/ml). [file elife-81521-fig1-data2.xlsx]

## Sheet: Figure 1d
		Figure 1 – Source Data 2: Raw data for Figure 1d. Short-term cell growth measured using the Cell-Titer-Glo luminescent cell viability assay with stable Ba/F3 cell lines expressing the murine thrombopoietin receptor (mTpoR) WT or mutant with no ligand or increasing concentrations of Tpo ligand (0.1–100 ng/ml).
		Cell Titer Glo Emitted luminescence / well normalized to IL-3 growth
		No cytokine	normalized SD	Tpo 0,1ng/ml	normalized SD	Tpo 1ng/ml	normalized SD	Tpo 10ng/ml	normalized SD	Tpo 100ng/ml	normalized SD
	BAF3 OLGA	0.0403194	0.006025	0.0414501	0.00537642	0.0588753	0.00694882	0.0861215	0.0100953	0.124714	0.0138919
	mTpoR	0.131275	0.0147278	0.227304	0.0229766	0.377563	0.0379791	0.536502	0.055778	0.71432	0.0747016
	V494N	0.445033	0.0461079	0.509396	0.0588034	0.557137	0.0783822	0.637635	0.0943217	0.951994	0.10962
	S498N	0.759358	0.0391679	0.752041	0.066383	0.775933	0.0412254	0.754284	0.0674394	0.807516	0.0880295
	G502N	1.13169	0.147225	1.17071	0.113577	1.11088	0.120174	1.01368	0.212807	1.06424	0.178263
	Biological replicates		3
	Technical replicates		1x3
