# Supplementary material for: Constitutive activation and oncogenicity are mediated by loss of helical structure at the cytosolic boundary of thrombopoietin receptor mutant dimers
Source: eLife. 2023 Jun 20;12:e81521. doi: 10.7554/eLife.81521 (PMC10313314; doi:10.7554/eLife.81521)
Supplement: Figure 2—figure supplement 1—source data 1. — Survival after transplantation of C57BL/6 female mice with retrovirus-infected C57BL/6 male bone marrow for expression of murine thrombopoietin receptor (mTpoR) wild type (WT) or mutant. [file elife-81521-fig2-figsupp1-data1.xlsx]

## Sheet: Fig 2-Supplement 1b
	Figure 2 – Source Data 3: Raw data and statistics (jmp pro12) for Figure 2 – Supplement 1b. Survival after transplantation of C57BL/6 female mice with retrovirus-infected C57BL/6 male bone marrow for expression of murine thrombopoietin receptor (mTpoR) wild type (WT) or mutant.
		Survival events
	Days	murine TpoR wild type	murine TpoR V494N	murine TpoR S498N	murine TpoR G502N
	36				1
	37				1
	37				1
	39				1
	46				1
	47				1
	50				0
	52				1
	52				1
	71				0
	89				0
	89				0
	36			1
	46			1
	46			0
	50			0
	71			0
	71			0
	89			0
	89			0
	89			0
	21		1
	35		0
	46		0
	50		0
	52		0
	89		0
	89		0
	89		0
	89		0
	46	0
	50	0
	89	0
	89	0
	89	0
	89	0
	89	0
	Comparison of Survival Curves
	Log-rank (Mantel-Cox) test
	Chi square	10.71
	df	3
	P value	0.0134
	P value summary	*
	Are the survival curves sig different?	Yes
	Logrank test for trend
	Chi square	9.1
	df	1
	P value	0.0026
	P value summary	**
	Sig. trend?	Yes
	Gehan-Breslow-Wilcoxon test
	Chi square	8.466
	df	3
	P value	0.0373
	P value summary	*
	Are the survival curves sig different?	Yes
