# Supplementary material for: Constitutive activation and oncogenicity are mediated by loss of helical structure at the cytosolic boundary of thrombopoietin receptor mutant dimers
Source: eLife. 2023 Jun 20;12:e81521. doi: 10.7554/eLife.81521 (PMC10313314; doi:10.7554/eLife.81521)
Supplement: Figure 2—source data 1. — Red blood cell, platelets, white blood cells, and neutrophils measured, using an MS9 blood cell counter, at day 40 after transplantation of C57BL/6 female mice with retrovirus-infected C57BL/6 male bone marrow for expression murine thrombopoietin receptor (mTpoR) wild type (WT) or mutant. [file elife-81521-fig2-data1.xlsx]

## Sheet: Figure 2a
	Figure 2 – Source Data 1: Raw data and statistics (Prism 9.1.2) for Figure 2a. Red blood cell, platelets, white blood cells and neutrophils measured, using an MS9 blood cell counter, at day 40 after transplantation of C57BL/6 female mice with retrovirus-infected C57BL/6 male bone marrow for expression murine thrombopoietin receptor (mTpoR) wild type (WT) or mutant.
	Red Blood Cells
			mTpoR WT	mTpoR V494N	mTpoR S498N	mTpoR G502N
		red blood cells x106 /mL	8.77	7.66	10.95	9.33
			12.53	7.65	10.94	9.64
			11.11	11.14	12.69	6.78
			8.86	7.34	10.75	9.99
			10.55	8.36	12.22	8.79
			11.3	8.2	10.6	8.73
			11.13		7.4
					7.69
					7.44
					11.97
					10.07
		number or mice: n=	7	6	11	6
	Kruskal-Wallis test
	P value	0.0536
	Exact or approximate P value?	Approximate
	P value summary	ns
	Do the medians vary signif. (P < 0.05)?	No
	Number of groups	4
	Kruskal-Wallis statistic	7.66
	Data summary
	Number of treatments (columns)	4
	Number of values (total)	30
	multiple comparison
	Number of families	1
	Number of comparisons per family	3
	Alpha	0.05
	Dunn's multiple comparisons test	Mean rank diff,	Significant?	Summary	Adjusted P Value	A-?
	mTpoR WT vs. mTpoR V494N	11.4	No	ns	0.0596
	mTpoR WT vs. mTpoR S498N	2.571	No	ns	>0,9999
	mTpoR WT vs. mTpoR G502N	9.238	No	ns	0.1778
	Test details	Mean rank 1	Mean rank 2	Mean rank diff,	n1	n2	Z
	mTpoR WT vs. mTpoR V494N	20.57	9.167	11.4	7	6	2.329
	mTpoR WT vs. mTpoR S498N	20.57	18	2.571	7	11	0.6041
	mTpoR WT vs. mTpoR G502N	20.57	11.33	9.238	7	6	1.886
	Platelets
			mTpoR WT	mTpoR V494N	mTpoR S498N	mTpoR G502N
		platelets x103 /mL	596	285	2820	2344
			427	362	3213	1891
			986	1352	1783	466
			634	408	2303	1898
			597	576	3504	2990
			447	644	1240	1696
			365		424
					344
					328
					2333
					420
		number or mice: n=	7	6	11	6
	Kruskal-Wallis test
	P value	0.0595
	Exact or approximate P value?	Approximate
	P value summary	ns
	Do the medians vary signif. (P < 0.05)?	No
	Number of groups	4
	Kruskal-Wallis statistic	7.425
	Data summary
	Number of treatments (columns)	4
	Number of values (total)	30
	multiple comparison
	Number of families	1
	Number of comparisons per family	3
	Alpha	0.05
	Dunn's multiple comparisons test	Mean rank diff,	Significant?	Summary	A-?
	mTpoR WT vs. mTpoR V494N	2.19	No	ns
	mTpoR WT vs. mTpoR S498N	-5.779	No	ns
	mTpoR WT vs. mTpoR G502N	-9.81	No	ns
	Test details	Mean rank 1	Mean rank 2	Mean rank diff,	n1	n2	Z
	mTpoR WT vs. mTpoR V494N	11.86	9.667	2.19	7	6	0.4472
	mTpoR WT vs. mTpoR S498N	11.86	17.64	-5.779	7	11	1.358
	mTpoR WT vs. mTpoR G502N	11.86	21.67	-9.81	7	6	2.003
	White Blood Cells
			mTpoR WT	mTpoR V494N	mTpoR S498N	mTpoR G502N
		white blood cells x103 /mL	1.64	4.54	4.36	195.23
			7.45	2.08	56.72	206.44
			4.4	12.38	0.22	9.44
			6.88	3.84	13.16	227.35
			7.11	5.26	209.99	191.24
			2.34	7.83	19.74	86.98
			4.73		10.07
					6.73
					9.09
					20.6
					11.35
		number or mice: n=	7	6	11	6
	Kruskal-Wallis test
	P value	0.0022
	Exact or approximate P value?	Approximate
	P value summary	**
	Do the medians vary signif. (P < 0.05)?	Yes
	Number of groups	4
	Kruskal-Wallis statistic	14.55
	Data summary
	Number of treatments (columns)	4
	Number of values (total)	30
	multiple comparison
	Number of families	1
	Number of comparisons per family	3
	Alpha	0.05
	Dunn's multiple comparisons test	Mean rank diff,	Significant?	Summary	A-?
	mTpoR WT vs. mTpoR V494N	-1.452	No	ns
	mTpoR WT vs. mTpoR S498N	-8.558	No	ns
	mTpoR WT vs. mTpoR G502N	-16.79	Yes	**
	Test details	Mean rank 1	Mean rank 2	Mean rank diff,	n1	n2	Z
	mTpoR WT vs. mTpoR V494N	8.714	10.17	-1.452	7	6	0.2965
	mTpoR WT vs. mTpoR S498N	8.714	17.27	-8.558	7	11	2.011
	mTpoR WT vs. mTpoR G502N	8.714	25.5	-16.79	7	6	3.427
	Neutrophils
			mTpoR WT	mTpoR V494N	mTpoR S498N	mTpoR G502N
		neutrophils (% of WBC)	6.9	7.9	13	43.3
			4.9	13.5	9.3	50.4
			16.5	22.2	11.3	4.4
			5.7	9.2	4.9	42.9
			4.6	3.3	38.2	51.9
			3.7	7.7	4.7	24.7
			4.5		2.2
					3.3
					3.3
					9.2
					3.5
		number or mice: n=	7	6	11	6
	Kruskal-Wallis test
	P value	0.0372
	Exact or approximate P value?	Approximate
	P value summary	*
	Do the medians vary signif. (P < 0.05)?	Yes
	Number of groups	4
	Kruskal-Wallis statistic	8.474
	Data summary
	Number of treatments (columns)	4
	Number of values (total)	30
	multiple comparison
	Number of families	1
	Number of comparisons per family	3
	Alpha	0.05
	Dunn's multiple comparisons test	Mean rank diff,	Significant?	Summary	A-?
	mTpoR WT vs. mTpoR V494N	-4.179	No	ns
	mTpoR WT vs. mTpoR S498N	-0.3831	No	ns
	mTpoR WT vs. mTpoR G502N	-12.26	Yes	*
	Test details	Mean rank 1	Mean rank 2	Mean rank diff,	n1	n2	Z
	mTpoR WT vs. mTpoR V494N	12.07	16.25	-4.179	7	6	0.8537
	mTpoR WT vs. mTpoR S498N	12.07	12.45	-0.3831	7	11	0.09007
	mTpoR WT vs. mTpoR G502N	12.07	24.33	-12.26	7	6	2.505
