# Supplementary material for: Constitutive activation and oncogenicity are mediated by loss of helical structure at the cytosolic boundary of thrombopoietin receptor mutant dimers
Source: eLife. 2023 Jun 20;12:e81521. doi: 10.7554/eLife.81521 (PMC10313314; doi:10.7554/eLife.81521)
Supplement: Figure 2—source data 2. — Liver and spleen weights (in grams) at day 40 after transplantation of C57BL/6 female mice with retrovirus-infected C57BL/6 male bone marrow for expression murine thrombopoietin receptor (mTpoR) wild type (WT) or mutant. [file elife-81521-fig2-data2.xlsx]

## Sheet: Figure 2c
	Figure 2 – Source Data 2: Raw data for Figure 2c. Liver and spleen weights (in grams), at day 40 after transplantation of C57BL/6 female mice with retrovirus-infected C57BL/6 male bone marrow for expression murine thrombopoietin receptor (mTpoR) wild type (WT) or mutant.
spleen weight		mean	SD		liver weight		mean	SD
	murine TpoR wild type (WT)	0.13	0.0282843			murine TpoR wild type (WT)	0.7585	0.214253
	murine TpoR V494N	0.254	0.203647			murine TpoR V494N	0.9305	0.0148492
	murine TpoR S498N	0.55185	0.311339			murine TpoR S498N	2.0975	1.36401
	murine TpoR G502N	0.6835	0.164756			murine TpoR G502N	3.731	1.65322
