# Supplementary material for: Constitutive activation and oncogenicity are mediated by loss of helical structure at the cytosolic boundary of thrombopoietin receptor mutant dimers
Source: eLife. 2023 Jun 20;12:e81521. doi: 10.7554/eLife.81521 (PMC10313314; doi:10.7554/eLife.81521)
Supplement: Figure 4—figure supplement 1—source data 1. — STAT5 transcriptional activity of the human thrombopoietin receptor (hTpoR) wild type (WT) or mutant assessed in HEK-293T cells by luciferase assay with STAT5 reporter Spi-Luc. [file elife-81521-fig4-figsupp1-data1.xlsx]

## Sheet: Fig 4-Supplement 1
				Figure 4 – Source Data 6: Raw data, scatter plot and statistics (Prism 9.1.2, jmp pro12) for Figure 4 – Supplement 1. STAT5 transcriptional activity of the human thrombopoietin receptor (hTpoR) wild type (WT) or mutant assessed in HEK-293T cells by luciferase assay with STAT5 reporter Spi-Luc.
		Normalized results on hTpoR WT of luciferase ratio as relative luciferase units (rlu)
	normalized results on hTpoR WT	PIG empty vector No cytokine	PIG empty vector Tpo 10 ng/mL	PIG empty vector Elt 0.7 mg/mL	hTpoR WT No cytokine	hTpoR WT Tpo 10 ng/mL	hTpoR WT Elt 0.7 mg/mL	hTpoR S505N No cytokine	hTpoR S505N Tpo 10 ng/mL	hTpoR S505N Elt 0.7 mg/mL	hTpoR W491A No cytokine	hTpoR W491A Tpo 10 ng/mL	hTpoR W491A Elt 0.7 mg/mL	hTpoR RWQFPGP No cytokine	hTpoR RWQFPGP Tpo 10 ng/mL	hTpoR RWQFPGP Elt 0.7 mg/mL	hTpoR W491A-RWQFPGP No cytokine	hTpoR W491A-RWQFPGP Tpo 10 ng/mL	hTpoR W491A-RWQFPGP Elt 0.7 mg/mL
	Biological triplicate 1 - technical triplicate	0.181	0.231	0.16	0.888	3.95	2.24	2.44	3.66	3.24	0.456	2.5	1.01	1.46	3.62	2.55	0.584	2.64	0.804
		0.171	0.24	0.204	0.994	3.84	2.27	2.68	3.8	3.46	0.459	2.5	1.09	1.53	3.58	2.78	0.626	2.71	0.882
		0.17	0.239	0.167	1.12	3.89	2.22	2.71	3.7	3.46	0.515	2.43	1.04	1.61	3.41	3.08	0.692	2.58	0.786
	Biological triplicate 2 - technical triplicate	0.191	0.226	0.195	0.989	3.27	2.23	2.24	3.46	3.19	0.393	2.09	0.505	1.41	3.49	2.44	0.759	2.93	0.822
		0.202	0.228	0.189	1.02	3.5	2.32	2.22	3.64	3.31	0.384	2.12	0.515	1.39	3.65	2.56	0.725	3.02	0.841
		0.203	0.244	0.202	0.986	3.26	2.27	2.36	3.24	3.4	0.38	2.05	0.518	1.48	3.71	2.58	0.691	3.13	0.928
	Biological triplicate 3 - technical triplicate	0.327	0.326	0.298	1.05	4.29	2.59	4.44	6.09	5.93	1.07	4.85	1.16	1.82	5.45	3.91	0.885	3.88	1.12
		0.29	0.296	0.267	0.995	3.95	2.34	4.16	6.03	5.82	0.947	4.6	1.21	1.67	5.33	4.15	0.824	3.43	1.1
		0.286	0.293	0.243	0.955	3.96	2.25	4.09	6.05	6.01	0.971	4.62	1.23	1.8	4.8	4.25	0.834	3.61	1.11
	non-parametric mutliple comparison Steel's test with hTpoR RWQFPGP No cytokine as control; p:				0.0034							0.0034		/	0.0034	0.0034	0.0034
	non-parametric mutliple comparison Steel's test with hTpoR W491A-RWQFPGP No cytokine as control; p:																/	0.0034	0.0698
	Biological replicates	3
	Technical replicates	3x3
	Kruskal-Wallis test
	P value	<0,0001
	Exact or approximate P value?	Approximate
	P value summary	****
	Do the medians vary signif. (P < 0.05)?	Yes
	Number of groups	10
	Kruskal-Wallis statistic	81.35
	Data summary
	Number of treatments (columns)	10
	Number of values (total)	90
							Supplement 1(/1) to Figure 4: scatter plot, mean with SEM
