# Supplementary material for: Constitutive activation and oncogenicity are mediated by loss of helical structure at the cytosolic boundary of thrombopoietin receptor mutant dimers
Source: eLife. 2023 Jun 20;12:e81521. doi: 10.7554/eLife.81521 (PMC10313314; doi:10.7554/eLife.81521)
Supplement: Figure 4—source data 1. — STAT5 transcriptional activity of the murine thrombopoietin receptor (mTpoR) wild type (WT) or mutant assessed in HEK-293T cells by luciferase assay with STAT5 reporter Spi-Luc. [file elife-81521-fig4-data1.xlsx]

## Sheet: Figure 4c
		Figure 4 – Source Data 1: Raw data, scatter plot and statistics (Prism 9.1.2, jmp pro12) for Figure 4c. STAT5 transcriptional activity of the murine thrombopoietin receptor (mTpoR) wild type (WT) or mutant assessed in HEK-293T cells by luciferase assay with STAT5 reporter Spi-Luc.
		Normalized results on mTpoR WT of luciferase ratio as relative luciferase units (rlu)
	normalized results on mTpoR WT	mTpoR WT No cytokine	mTpoR WT Tpo 10 ng/mL	mTpoR KWGPP No cytokine	mTpoR KWGPP Tpo 10 ng/mL	mTpoR KWQGP No cytokine	mTpoR KWQGP Tpo 10 ng/mL	mTpoR KWQFPGP No cytokine	mTpoR KWQFPGP Tpo 10 ng/mL	mTpoR KWQFPAGP No cytokine	mTpoR KWQFPAGP Tpo 10 ng/mL	mTpoR YGPLRH No cytokine	mTpoR YGPLRH Tpo 10 ng/mL	mTpoR YGPLGP No cytokine	mTpoR YGPLGP Tpo 10 ng/mL
	Biological triplicate 1 - technical triplicate	1.75819	3.31749	0.047954	2.26625	1.03096	2.11368	1.88806	3.09641	4.22462	3.94251	0.375977	1.07249	0.239765	0.962967
		0.241812	4.43045		2.28198	1.1976	1.84422	2.06695	2.67066	2.61389	3.32532	0.970724	1.03143	0.775069	1.06878
			3.94609	1.55875	3.03244	1.44963	1.59244	2.63532	5.63216	3.02083	2.69957	0.516468	1.18152	0.620543	1.00853
	Biological triplicate 2 - technical triplicate	0.713736	2.3723	1.35177	4.24504	1.06949	3.52092	3.29187	5.67737	2.67131	4.40971	1.37495	2.87579	0.918757	1.49749
		1.01256	3.39684	1.11625	5.58036	2.90518	3.94062	3.67939	5.81226	3.66086	8.03396	0.6856	2.97561	0.79752	2.01594
		1.27371	2.23956	2.14881	2.96829	3.78641	4.34596	4.92154	7.34161	4.31434	6.99251	1.46704	1.71158	0.739657	1.61291
	Biological triplicate 3 - technical triplicate	0.342625	6.86154	1.2623	3.96388	1.08919	3.49821	1.59075	5.77113	1.50683	6.68911		1.61927	0.339024	1.24854
		0.338516	8.56687	0.339577	4.05187	1.09978	4.1856	2.38974	6.82779	2.06962	6.02489	0.686376	2.69524	0.501012	1.23063
		2.31886	6.78141	0.993283	4.41041	1.49852	4.27851	1.91897	6.71669	3.32717	6.40199	0.719519	2.4638	0.329571	1.02725
	non-parametric multiple comparison Steel's test with mTpoR WT No cytokine as control; p:	/	0.0096	1.0000		0.5814		0.0321		0.0179		1.0000		0.9516
	non-parametric multiple comparison Steel's test with mTpoR WT+Tpo as control; p:		/		0.9979		0.9069		0.9979		0.9995		0.0456		0.0047
																		Figure 4b: scatter plot, mean with SEM
	Biological replicates	3
	Technical replicates	3x3
	Kruskal-Wallis test
	P value	<0,0001
	Exact or approximate P value?	Approximate
	P value summary	****
	Do the medians vary signif. (P < 0.05)?	Yes
	Number of groups	14
	Kruskal-Wallis statistic	92.85
	Data summary
	Number of treatments (columns)	14
	Number of values (total)	123
