# Supplementary material for: Constitutive activation and oncogenicity are mediated by loss of helical structure at the cytosolic boundary of thrombopoietin receptor mutant dimers
Source: eLife. 2023 Jun 20;12:e81521. doi: 10.7554/eLife.81521 (PMC10313314; doi:10.7554/eLife.81521)
Supplement: Figure 4—source data 2. — STAT5 transcriptional activity of the murine thrombopoietin receptor (mTpoR) wild type (WT) or mutant assessed in HEK-293T cells by luciferase assay with STAT5 reporter Spi-Luc. [file elife-81521-fig4-data2.xlsx]

## Sheet: Figure 4d
	Figure 4 – Source Data 2: Raw data, scatter plot and statistics (Prism 9.1.2, jmp pro12) for Figure 4d. STAT5 transcriptional activity of the murine thrombopoietin receptor (mTpoR) wild type (WT) or mutant assessed in HEK-293T cells by luciferase assay with STAT5 reporter Spi-Luc.
		Normalized results on mTpoR WT of luciferase ratio as relative luciferase units (rlu)
		mTpoR WT no cytokine	mTpoR WT Tpo 10 ng/mL	mTpoR YAALAA no cytokine	mTpoR YAALAA Tpo 10 ng/mL
	Biological triplicate 1 - technical triplicate		3.60845	0.772807	3.32398
		1.12539	3.46882	0.515375	3.54272
		0.874614	4.29135	0.736849	4.24949
	Biological triplicate 2 - technical triplicate	1.04424	7.14327	0.82708	5.44235
		0.927857	6.94228	1.20878	6.29728
		1.02791	8.00043	1.07407	6.27285
	Biological triplicate 3 - technical triplicate	1.27989	10.6022	1.32516	8.18001
		1.04481	9.59342	0.850328	7.78944
		0.675298	9.48144	0.604535	7.9603
	non-parametric multiple comparison Steel's test with mTpoR WT-Tpo as control; p:	/	0.0018	0.6095	0.0018
								Figure 4d: scatter plot, mean with SEM
	Biological replicates	3
	Technical replicates	3x3
	Kruskal-Wallis test
	P value	<0,0001
	Exact or approximate P value?	Approximate
	P value summary	****
	Do the medians vary signif. (P < 0.05)?	Yes
	Number of groups	4
	Kruskal-Wallis statistic	26.1
	Data summary
	Number of treatments (columns)	4
	Number of values (total)	35
