# Supplementary material for: Constitutive activation and oncogenicity are mediated by loss of helical structure at the cytosolic boundary of thrombopoietin receptor mutant dimers
Source: eLife. 2023 Jun 20;12:e81521. doi: 10.7554/eLife.81521 (PMC10313314; doi:10.7554/eLife.81521)
Supplement: Figure 4—source data 3. — STAT5 transcriptional activity of the human thrombopoietin receptor (hTpoR) wild type (WT) or mutant assessed in HEK-293T cells by luciferase assay with STAT5 reporter Spi-Luc. [file elife-81521-fig4-data3.xlsx]

## Sheet: Figure 4e
		Figure 4 – Source Data 3: Raw data, scatter plot and statistics (Prism 9.1.2, jmp pro12) for Figure 4e. STAT5 transcriptional activity of the human thrombopoietin receptor (hTpoR) wild type (WT) or mutant assessed in HEK-293T cells by luciferase assay with STAT5 reporter Spi-Luc.
		Normalized results on hTpoR WT of luciferase ratio as relative luciferase units (rlu)
		hTpoR WT No cytokine	hTpoR WT Tpo 10 ng/mL	hTpoR RWQFPGP No cytokine	hTpoR RWQFPGP Tpo 10 ng/mL	hTpoR +2ARWQFPGP No cytokine	hTpoR +2ARWQFPGP Tpo 10 ng/mL	hTpoR RWQFPAGP No cytokine	hTpoR RWQFPAGP Tpo 10 ng/mL	hTpoR +2ARWQFPAGP No cytokine	hTpoR +2ARWQFPAGP Tpo 10 ng/mL
	Biological triplicate 1 - technical triplicate	1.02704	2.46336	1.18452	2.06771	1.38991	3.43728	1.45178	2.08703	0.970941	1.80746
		1.03988	1.69787	1.4255	1.91373	0.898659	2.10393	1.08727	1.68901	1.01593	2.33161
		0.93308	2.6616	1.39039	2.52369	1.10299	2.39225	1.17418	2.22834	0.886509	2.55667
	Biological triplicate 2 - technical triplicate	1.03015	2.4487	1.69211	2.29221	1.46303	2.9053	1.29693	2.39477	1.12802	2.0558
		0.991725	2.25873	1.49649	2.11315	1.66159	2.2068	1.20844	2.08383	1.18672	2.05553
		0.978122	2.74769	1.25896	2.00187	1.12651	2.7742	0.977173	1.9533	0.863882	2.09847
	Biological triplicate 3 - technical triplicate	1.31066	2.82611	2.7121	3.91741	2.1057	4.73081	1.96661	1.55095	2.74725	3.12643
		0.715535	2.81139	2.52512	3.21509	2.11442	1.94906	1.02988	2.58386	1.7443	3.28983
		0.973805	2.73096	2.94872	3.42081	1.76248	3.53796	0.882079	3.35783	2.10342	2.73989
	Biological triplicate 4 - technical triplicate	1.48435	2.9687	2.00728	2.2605	2.12168	2.3071	1.46286	1.32025	1.42259	2.8323
		0.721651	2.74715	1.72443	2.35136	1.81396	2.3579	1.54203	2.26345	1.52275	1.96548
		0.794001	2.19903	2.20173	2.60758	1.39283	2.32888	0.685555	2.19957	1.06504	2.83859
	Biological triplicate 5 - technical triplicate			1.13708	2.21308	1.12376	1.39182	0.962517	2.0933	0.867895	2.13088
				1.25706	1.95031	1.02396	1.76507	0.965292	1.8408	1.14959	2.01764
				1.37332	1.96256	1.37536	1.82819	0.990928	1.92544	0.884615	1.74435
	Biological triplicate 6 - technical triplicate			1.48725	2.75078	1.39824	2.9395	1.41222	2.45095	1.36365	2.40936
				1.87135	3.14139	1.44243	2.15355	1.5564	1.97167	0.854787	2.67009
				1.76011	2.60728	1.22798	2.85353	0.920751	2.65299	1.04637	2.75434
	non-parametric multiple comparison Steel's test with hTpoR WT No cytokine as control; p:	/		0.0002		0.0028		0.3880		0.2938
																Figure 4d: scatter plot, mean with SEM
	Biological replicates	6
	Technical replicates	6x3
	Kruskal-Wallis test
	P value	<0,0001
	Exact or approximate P value?	Approximate
	P value summary	****
	Do the medians vary signif. (P < 0.05)?	Yes
	Number of groups	4
	Kruskal-Wallis statistic	21.21
	Data summary
	Number of treatments (columns)	4
	Number of values (total)	66
