# Supplementary material for: Constitutive activation and oncogenicity are mediated by loss of helical structure at the cytosolic boundary of thrombopoietin receptor mutant dimers
Source: eLife. 2023 Jun 20;12:e81521. doi: 10.7554/eLife.81521 (PMC10313314; doi:10.7554/eLife.81521)
Supplement: Figure 4—source data 4. — Short-term cell growth measured using the Cell-Titer-Glo luminescent cell viability assay with stable Ba/F3 cell lines expressing the murine thrombopoietin receptor (mTpoR) wild type (WT) or mutant with no ligand or increasing concentrations of Tpo ligand (0.1–50 ng/ml) or murine IL-3. [file elife-81521-fig4-data4.xlsx]

## Sheet: Figure 4f
					Figure 4 – Source Data 4: Raw data, scatter plot and statistics (Prism 9.1.2) for Figure 4f. Short-term cell growth measured using the Cell-Titer-Glo luminescent cell viability assay with stable Ba/F3 cell lines expressing the murine thrombopoietin receptor (mTpoR) wild type (WT) or mutant with no ligand or increasing concentrations of Tpo ligand (0.1–50 ng/ml) or murine IL-3.
			Cell Titer Glo Emitted luminescence / well after 72h normalized to TpoR WT without cytokines
		Ba/F3 infected with: Stimulation:	Parental No cytokine	Parental Tpo 0.1 ng/mL	Parental Tpo 1 ng/mL	Parental Tpo 10 ng/mL	Parental Tpo 50 ng/mL	Parental IL-3 20 ng/mL	mTpoR WT No cytokine	mTpoR WT Tpo 0.1 ng/mL	mTpoR WT Tpo 1 ng/mL	mTpoR WT Tpo 10 ng/mL	mTpoR WT Tpo 50 ng/mL	mTpoR WT IL-3 20 ng/mL	mTpoR KWQFPGP No cytokine	mTpoR KWQFPGP Tpo 0.1 ng/mL	mTpoR KWQFPGP Tpo 1 ng/mL	mTpoR KWQFPGP Tpo 10 ng/mL	mTpoR KWQFPGP Tpo 50 ng/mL	mTpoR KWQFPGP IL-3 20 ng/mL	mTpoR YGPLRH No cytokine	mTpoR YGPLRH Tpo 0.1 ng/mL	mTpoR YGPLRH Tpo 1 ng/mL	mTpoR YGPLRH Tpo 10 ng/mL	mTpoR YGPLRH Tpo 50 ng/mL	mTpoR YGPLRH IL-3 20 ng/mL	mTpoR YGPLGP No cytokine	mTpoR YGPLGP Tpo 0.1 ng/mL	mTpoR YGPLGP Tpo 1 ng/mL	mTpoR YGPLGP Tpo 10 ng/mL	mTpoR YGPLGP Tpo 50 ng/mL	mTpoR YGPLGP IL-3 20 ng/mL
		Biological triplicate 1 - technical triplicate	40.7143	47.9464	50.8929	62.4107	64.5536	1044.64	0.803571	31.875	576.161	1194.64	1293.48	394.554	162.214	327.857	890.357	1338.75	1338.21	917.143	73.1518	78.8839	86.6786	140.625	172.741	994.286	94.7143	103.848	137.598	118.071	114.402	799.554
			59.4643	63.4821	54.6429	80.8929	75.2679	1092.86	1.15179	37.7411	551.518	1329.91	1312.5	413.839	148.125	323.571	795	1255.98	1229.2	961.339	74.3304	71.625	86.4107	135.536	182.036	983.036	111.107	99.5625	104.866	119.277	120	866.25
			46.875	56.5179	66.9643	74.1964	77.6786	1127.68	1.04464	60.0536	478.661	1246.88	1156.88	355.446	177.188	308.839	804.911	1307.68	1102.5	1021.34	70.6875	69.7768	99.4554	148.982	170.812	947.411	103.955	108.536	99.6696	119.009	119.839	868.393
		Biological triplicate 2 - technical triplicate	0.522727	0.659091	1.06818	2.97727	1.72727	715.909	1.02273	56.3182	694.773	1091.59	1234.32	559.091	40.3182	283.182	707.955	1391.36	1354.32	945.455	15.7091	20.85	25.3182	29.1818	52.75	954.773	9.09318	13.2318	10.8886	7.02273	7.57045	830
			1.22727	0.704545	1.11364	2.25	1.77273	668.182	1	62.3864	614.091	1149.32	1295.91	569.545	48.25	436.591	692.273	1370.68	1532.05	1000	16.2341	28.1818	22.3296	46.5	46.1818	878.409	7.04545	9.47955	9.275	13.6864	14.6182	834.773
			0.909091	0.818182	0.704545	1.25	1.47727	709.091	0.977273	67.0682	678.636	1178.64	1362.5	591.818	48.2955	370.682	616.364	1182.95	1305	942.955	19.4636	23.3864	20.6	27.5227	43.2727	826.591	7.47955	8.84318	14.2318	10.4341	8.88864	846.591
		Biological triplicate 3 - technical triplicate	1.03846	1.46154	1	1.46154	2.30769	1165.38	0.923077	27.2692	765.385	1403.85	1888.46	676.923	492.308	680.769	1746.15	2423.08	2892.31	2219.23	54.2308	51.9231	63.0769	137.308	166.154	1650	45.3846	44.2308	59.6154	70	66.9231	1761.54
			1.38461	0.730769	1.69231	3.88462	0.423077	1234.62	1.15385	30.7308	1576.92	1607.69	1903.85	711.538	534.615	676.923	1880.77	2426.92	2530.77	2292.31	48.0769	53.0769	69.2308	128.077	144.615	1700	60	45.3846	58.4615	70.3846	96.9231	1973.08
			0.961538	0.846154	0.615385	1.11539	1.38461	1219.23	0.923077	58.4615	1026.92	1665.38	1888.46	711.538	588.462	1119.23	1784.62	2476.92	2607.69	2496.15	47.6923	56.9231	82.6923	116.923	160	1734.62	65.7692	34.0769	59.2308	79.6154	93.4615	1884.62
	Biological replicates		3
	Technical replicates		3x3
		Kruskal-Wallis test
		P value	<0,0001
		Exact or approximate P value?	Approximate
		P value summary	****
		Do the medians vary signif. (P < 0.05)?	Yes
		Number of groups	5
		Kruskal-Wallis statistic	28.83
		Data summary
		Number of treatments (columns)	5
		Number of values (total)	45
											Figure 4e: scatter plot, mean with SEM
		Multiple comparison
		Number of families	1
		Number of comparisons per family	4
		Alpha	0.05
		Dunn's multiple comparisons test	Mean rank diff,	Significant?	Summary	Adjusted P Value
		mTpoR KWQFPGP vs. Parental	22.89	Yes	***	0.0009
		mTpoR KWQFPGP vs. WT	29.22	Yes	****	<0,0001
		mTpoR KWQFPGP vs.YGPLRH	9.556	No	ns	0.4909
		mTpoR KWQFPGP vs. YGPLGP	8.889	No	ns	0.6043
		Test details	Mean rank 1	Mean rank 2	Mean rank diff,	n1	n2	Z
		mTpoR KWQFPGP vs. Parental	37.11	14.22	22.89	9	9	3.697
		mTpoR KWQFPGP vs. WT	37.11	7.889	29.22	9	9	4.72
		mTpoR KWQFPGP vs.YGPLRH	37.11	27.56	9.556	9	9	1.543
		mTpoR KWQFPGP vs. YGPLGP	37.11	28.22	8.889	9	9	1.436
