# Supplementary material for: Constitutive activation and oncogenicity are mediated by loss of helical structure at the cytosolic boundary of thrombopoietin receptor mutant dimers
Source: eLife. 2023 Jun 20;12:e81521. doi: 10.7554/eLife.81521 (PMC10313314; doi:10.7554/eLife.81521)
Supplement: Figure 4—source data 5. — Short-term cell growth measured using the Cell-Titer-Glo luminescent cell viability assay with stable Ba/F3 cell lines expressing the murine thrombopoietin receptor (mTpoR) wild type (WT) or mutant with no ligand or increasing concentrations of Tpo ligand (0.1–50 ng/ml). [file elife-81521-fig4-data5.xlsx]

## Sheet: Figure 4g
				Figure 4 – Source Data 5: Raw data, scatter plot and statistics (Prism 9.1.2) for Figure 4g. Short-term cell growth measured using the Cell-Titer-Glo luminescent cell viability assay with stable Ba/F3 cell lines expressing the murine thrombopoietin receptor (mTpoR) wild type (WT) or mutant with no ligand or increasing concentrations of Tpo ligand (0.1–50 ng/ml).
			Cell Titer Glo Emitted luminescence / well (rlu) after 72h
		Ba/F3 infected with: Stimulation:	mTpoR WT No cytokine	mTpoR WT Tpo 0.1 ng/mL	mTpoR WT Tpo 1 ng/mL	mTpoR WT Tpo 10 ng/mL	mTpoR WT Tpo 50 ng/mL	mTpoR KWQFPGP No cytokine	mTpoR KWQFPGP Tpo 0.1 ng/mL	mTpoR KWQFPGP Tpo 1 ng/mL	mTpoR KWQFPGP Tpo 10 ng/mL	mTpoR KWQFPGP Tpo 50 ng/mL
		Biological triplicate 1 - technical triplicate	810	41100	193000	243000	233000	618000	683000	700000	933000	862000
			890	76800	201000	274000	262000	603000	672000	769000	947000	950000
			740	43300	190000	228000	248000	608000	712000	755000	1060000	939000
		Biological triplicate 2 - technical triplicate	1110	19000	161000	169000	179000	475000	477000	575000	772000	849000
			1120	26700	166000	194000	196000	584000	487000	587000	774000	856000
			1600	76500	164000	170000	178000	730000	503000	583000	777000	853000
		Biological replicates	2
		Technical replicates	2x3
		Kruskal-Wallis test
		P value	<0,0001
		Exact or approximate P value?	Approximate
		P value summary	****
		Do the medians vary signif. (P < 0.05)?	Yes
		Number of groups	4
		Kruskal-Wallis statistic	21.6
		Data summary
		Number of treatments (columns)	4
		Number of values (total)	24							Figure 4f: scatter plot, mean with SEM
		Multiple comparison
		Number of comparisons per family	3
		Alpha	0.05
		Dunn's multiple comparisons test	Mean rank diff,	Significant?	Summary	Adjusted P Value
		mTpoR WT No cytokine vs. mTpoR WT Tpo 0.1 ng/mL	-6	No	ns	0.4249
		mTpoR WT No cytokine vs. mTpoR WT Tpo 1 ng/mL	-12	Yes	**	0.0099
		mTpoR WT No cytokine vs. mTpoR KWQFPGP No cytokine	-18	Yes	****	<0,0001
		Test details	Mean rank 1	Mean rank 2	Mean rank diff,	n1	n2	Z
		BaF3 TpoR WT vs. BaF3 TpoR WT ,1	3.5	9.5	-6	6	6	1.47
		BaF3 TpoR WT vs. BaF3 TpoR WT 1	3.5	15.5	-12	6	6	2.939
		BaF3 TpoR WT vs. BaF3 TpoR GP	3.5	21.5	-18	6	6	4.409
