# Supplementary material for: Constitutive activation and oncogenicity are mediated by loss of helical structure at the cytosolic boundary of thrombopoietin receptor mutant dimers
Source: eLife. 2023 Jun 20;12:e81521. doi: 10.7554/eLife.81521 (PMC10313314; doi:10.7554/eLife.81521)
Supplement: Figure 5—source data 1. — STAT5 transcriptional activity of the murine thrombopoietin receptor (mTpoR) wild type (WT) or mutant assessed in HEK-293T cells by luciferase assay with STAT5 reporter Spi-Luc. [file elife-81521-fig5-data1.xlsx]

## Sheet: Figure 5d
	Figure 5 – Source Data 1: Raw data, scatter plot and statistics (Prism 9.1.2, jmp pro12) for Figure 5d. STAT5 transcriptional activity of the murine thrombopoietin receptor (mTpoR) wild type (WT) or mutant assessed in HEK-293T cells by luciferase assay with STAT5 reporter Spi-Luc.
		Normalized results on mTpoR WT of luciferase ratio as relative luciferase units (rlu)
		mTpoR WT No cytokine	mTpoR WT Tpo 10 ng/mL	mTpoR WT+2A No cytokine	mTpoR WT+2A Tpo 10 ng/mL
	Biological triplicate 1 - technical triplicate	0.965705	6.08063	3.18381	6.13189
		1.02995	5.11368	2.85201	6.01725
		1.00435	4.74559	2.61932	6.66555
	Biological triplicate 2 - technical triplicate	0.883717	2.47821	1.39208	3.35244
		0.958313	2.13845	1.46298	3.38961
		1.15797	2.28068	1.85399	3.08023
	Biological triplicate 3 - technical triplicate	0.958029	4.11759	2.58249	5.70549
		0.893053	4.09436	2.14415	6.09955
		1.14892	4.58751	2.46022	7.06801
	non-parametric multiple comparison Steel's test with mTpoR WT No cytokine as control; p:	/	0.0008	0.0008
	Biological replicates	3
	Technical replicates	3x3						Figure 5d: scatter plot, mean with SEM
	Kruskal-Wallis test
	P value	<0,0001
	Exact or approximate P value?	Approximate
	P value summary	****
	Do the medians vary signif. (P < 0.05)?	Yes
	Number of groups	4
	Kruskal-Wallis statistic	27.56
	Data summary
	Number of treatments (columns)	4
	Number of values (total)	36
