# Supplementary material for: Constitutive activation and oncogenicity are mediated by loss of helical structure at the cytosolic boundary of thrombopoietin receptor mutant dimers
Source: eLife. 2023 Jun 20;12:e81521. doi: 10.7554/eLife.81521 (PMC10313314; doi:10.7554/eLife.81521)
Supplement: Figure 5—source data 2. — STAT5 transcriptional activity of the murine thrombopoietin receptor (mTpoR) wild type (WT) or mutant assessed in HEK-293T cells by luciferase assay with STAT5 reporter Spi-Luc. [file elife-81521-fig5-data2.xlsx]

## Sheet: Figure 5e
				Figure 5 – Source Data 2: Raw data, scatter plot and statistics (Prism 9.1.2, jmp pro12) for Figure 5e. STAT5 transcriptional activity of the murine thrombopoietin receptor (mTpoR) wild type (WT) or mutant assessed in HEK-293T cells by luciferase assay with STAT5 reporter Spi-Luc.
		Normalized results on mTpoR WT of luciferase ratio as relative luciferase units (rlu)
		mTpoR WT no cytokine	mTpoR WT Tpo 10ng/mL	mTpoR S498N no cytokine	mTpoR S498N Tpo 10ng/mL	mTpoR S498N+2A no cytokine	mTpoR S498N+2A Tpo 10ng/mL	mTpoR A499N no cytokine	mTpoR A499N Tpo 10ng/mL	mTpoR A499N+2A no cytokine	mTpoR A499N+2A Tpo 10ng/mL	mTpoR G502N no cytokine	mTpoR G502N Tpo 10ng/mL	mTpoR G502N+2A no cytokine	mTpoR G502N+2A Tpo 10ng/mL
	Biological triplicate 1 - technical triplicate	0.972	3.37	1.86	3.05	1.28	2.57	1.07	3.08	1.32	2.02	2.29	2.75	1.44	2.42
		1.01	3.08	1.44	3.01	1.22	2.24	1.14	3.39	1.22	1.86	2.67	2.62	1.91	2.39
		1.02	3.16	1.58	2.93	1.52	2.38	1.19	3.19	1.3	2.36	2.6	2.83	1.74	2.43
	Biological triplicate 2 - technical triplicate	0.986	2.24	1.45	2.16	1.13	1.76	0.694	2.11	0.965	1.35	1.41	1.73	1.12	1.5
		1.05	2.11	1.32	1.87	1.07	1.72	0.803	1.9	0.999	1.15	1.57	1.61	1.23	1.34
		0.96	2.19	1.86	1.89	1.42	1.53	0.949	1.65	1.21	1.22	1.65	1.42	1.08	1.39
	Biological triplicate 3 - technical triplicate	0.904	3	1.48	2.39	1.18	2.1
		1.04	3.09	2.16	2.22	1.34	2.41
		1.05	3	1.83	3.02	1.23	2.15
	Biological triplicate 4 - technical triplicate	1.16	2.47	1.71	2.75	1.46	2.29	0.816	2.29	1.19	1.72
		0.881	2.49	1.82	2.59	1.48	2	1.05	2.19	1.1	1.51
		0.964	2.25	1.8	2.31	1.47	1.82	1.2	1.92	1.17	1.49
	Biological triplicate 5 - technical triplicate	0.87	2.94	1.6	2.65	1.43	3.01	0.409	1.45	1.16	2.03	1.52	2.31	0.848	1.24
		1.07	2.94	1.77	2.69	1.75	2.8	0.445	1.52	1.27	2.13	1.64	1.92	0.92	1.48
		1.06	2.95	1.79	2.56	1.82	2.86	0.467	1.73	1.3	2.14	1.67	1.94	0.863	1.36
	Biological triplicate 6 - technical triplicate	1.07	2.93	3.07	4.3	1.05	1.72			1.91	2.76	2.96	3.33	2.42	3.1
		1.01	2.97	2.86	4.12	1.07	2.13			1.89	2.56	2.93	3.06	2.58	3.29
		0.921	3.06	2.97	4.06	1	1.99			1.97	2.53	3.08	3.18	2.27	3.05
	non-parametric multiple comparison Steel's test with mTpoR WT No cytokine as control; p:	/		<0.0001		<0.0001		0.9135		0.0004		<0.0001		0.1120
	non-parametric multiple comparison Steel's test with mTpoR S498N No cytokine as control; p:			/		0.0004
	non-parametric multiple comparison Steel's test with mTpoR A499N No cytokine as control; p:							/		0.0032
	non-parametric multiple comparison Steel's test with mTpoR G502N No cytokine as control; p:											/		0.1526
	Biological replicates	6
	Technical replicates	3x6
	Kruskal-Wallis test
	P value	<0,0001
	Exact or approximate P value?	Approximate
	P value summary	****
	Do the medians vary signif. (P < 0.05)?	Yes
	Number of groups	14
	Kruskal-Wallis statistic	136.5
	Data summary
	Number of treatments (columns)	14
	Number of values (total)	210
							Figure 5e: scatter plot, mean with SEM
