# Supplementary material for: Constitutive activation and oncogenicity are mediated by loss of helical structure at the cytosolic boundary of thrombopoietin receptor mutant dimers
Source: eLife. 2023 Jun 20;12:e81521. doi: 10.7554/eLife.81521 (PMC10313314; doi:10.7554/eLife.81521)
Supplement: Figure 5—source data 3. — STAT5 transcriptional activity of the murine thrombopoietin receptor (mTpoR) wild type (WT) or mutant assessed in HEK-293T cells by luciferase assay with STAT5 reporter Spi-Luc. [file elife-81521-fig5-data3.xlsx]

## Sheet: Figure 5f
	Figure 5 – Source Data 3: Raw data, scatter plot and statistics (Prism 9.1.2, jmp pro12) for Figure 5f. STAT5 transcriptional activity the murine thrombopoietin receptor (mTpoR) wild type (WT) or mutant assessed in HEK-293T cells by luciferase assay with STAT5 reporter Spi-Luc.
		Normalized results on mTpoR WT of luciferase ratio as relative luciferase units (rlu)
		mTpoR WT No cytokine	mTpoR WT Tpo 10 ng/mL	mTpoR W508K No cytokine	mTpoR W508K Tpo 10 ng/mL	mTpoR W508K+2A No cytokine	mTpoR W508K+2A Tpo 10 ng/mL
	Biological triplicate 1 - technical triplicate	1.5369		4.30446	5.20631	2.00748	3.52257
		0.710991	4.58629	3.13683	4.76677	0.979351	4.05635
		0.752106	5.95403	2.74806	5.6742	1.19915	2.40849
	Biological triplicate 2 - technical triplicate	0.882212	3.89238	2.15138	3.58122	1.51274	3.80705
		1.03684	2.95065	2.38831	4.03461	0.425081	4.75993
		1.08095	2.45658	2.69862	3.87614	1.47997	2.65435
	Biological triplicate 3 - technical triplicate	1.02545	2.57307	4.291	3.64275	1.21002	3.97754
		0.884015	3.19052	3.23823	3.77309	1.66771	2.14143
		1.09053	3.16724	3.49336	4.73491	1.55395	2.31312
	Biological triplicate 2 - technical triplicate	1.40991	2.23919	3.34748	2.8983	0.849745	1.20901
		0.662682	2.24879	2.66149	3.62081	0.882325	1.8889
		0.927406	2.72768	2.6121	4.55918	0.969693	1.85863
	non-parametric multiple comparison Steel's test with mTpoR WT No cytokine as control; p:	/		<0.0001		0.2677
	non-parametric multiple comparison Steel's test with mTpoR W508K No cytokine as control; p:	<0.0001		/		<0.0001
									Figure 5f: scatter plot, mean with SEM
	Biological replicates	4
	Technical replicates	3x4
	Kruskal-Wallis test
	P value	<0,0001
	Exact or approximate P value?	Approximate
	P value summary	****
	Do the medians vary signif. (P < 0.05)?	Yes
	Number of groups	3
	Kruskal-Wallis statistic	45.25
	Data summary
	Number of treatments (columns)	3
	Number of values (total)	66
