# Supplementary material for: Constitutive activation and oncogenicity are mediated by loss of helical structure at the cytosolic boundary of thrombopoietin receptor mutant dimers
Source: eLife. 2023 Jun 20;12:e81521. doi: 10.7554/eLife.81521 (PMC10313314; doi:10.7554/eLife.81521)
Supplement: Figure 5—source data 4. — STAT5 transcriptional activity of the human thrombopoietin receptor (hTpoR) wild type (WT) or mutant assessed in HEK-293T cells by luciferase assay with STAT5 reporter Spi-Luc. [file elife-81521-fig5-data4.xlsx]

## Sheet: Figure 5g
		Figure 5 – Source Data 4: Raw data, scatter plot and statistics (Prism 9.1.2, jmp pro12) for Figure 5g. STAT5 transcriptional activity of the human thrombopoietin receptor (hTpoR) wild type (WT) or mutant assessed in HEK-293T cells by luciferase assay with STAT5 reporter Spi-Luc.
		Normalized results on hTpoR WT of luciferase ratio as relative luciferase units (rlu)
		hTpoR WT No cytokine	hTpoR WT Tpo 10 ng/mL	hTpoR WT+2A No cytokine	hTpoR WT+2A Tpo 10 ng/mL	hTpoR S505N No cytokine	hTpoR S505N Tpo 10 ng/mL	hTpoR S505N+2A No cytokine	hTpoR S505N+2A Tpo 10 ng/mL	hTpoR W515K No cytokine	hTpoR W515K Tpo 10 ng/mL	hTpoR W515K+2A No cytokine	hTpoR W515K+2A Tpo 10 ng/mL
	Biological triplicate 1 - technical triplicate			1.0003	2.63704			1.32412	2.10179			0.809155	1.84334
				1.28027	2.08289			1.0895	1.87577			1.17146	1.7661
				0.92482	2.8947			1.09226	2.05387			0.786017	2.21354
	Biological triplicate 2 - technical triplicate			1.21832	2.1711			1.25569	1.78692			0.891267	1.62218
				1.23093	2.3203			1.61271	1.63617			0.610811	1.97545
				0.987865	1.7217			1.0195	2.08861			0.598344	1.7496
	Biological triplicate 3 - technical triplicate			1.84335	2.57528		3.99546	1.94094	2.02023	5.89547	5.27599	3.13095	5.18316
				2.44183	2.2342	2.01447	3.18583	1.8518	2.87214	3.09326	4.44563	1.81508	3.97979
				1.35846	3.21835	3.31094	2.82454	1.6656	3.38124	4.29012	4.79979	2.34789	4.23307
	Biological triplicate 4 - technical triplicate			1.83102	1.59786	3.45111	2.82193	1.3127	1.96871	5.88918	4.52526	3.29165	3.48147
				1.61106	1.51691	2.59304	1.99956	1.51939	1.83759	5.02333	4.77302	1.98061	3.79953
				1.0397	2.35498	2.30279	2.91149	1.07117	2.17258	3.69417	4.29916	1.64002	3.9613
	Biological triplicate 5 - technical triplicate	1.01381	2.33397	0.745356	1.68815					1.72082	2.65286	0.740535	1.92513
		0.706508	2.73218	0.842667	2.56124					1.98437	2.03434	1.14893	2.60036
		1.27968	2.21672	1.0723	1.89136					2.04222	1.83749	1.38837	2.58275
	Biological triplicate 6 - technical triplicate	1.09137	1.98793	1.40372	2.88566					2.10215	2.21551	1.19986	1.95899
		0.967346	2.01434	1.55113	2.55873					2.18632	2.62611	1.39715	1.7325
		0.941285	2.7831	1.06246	2.70629					2.06165	2.83588	1.15734	2.52676
	Biological triplicate 7 - technical triplicate	1.03031	1.94582	1.02269	2.23007	1.4439	1.79714	0.945321	1.88796	2.09922	2.68141	1.24107	2.11444
		0.909825	2.0801	1.39101	2.58825	1.8335	1.82589	1.63275	1.52515	2.30346	2.12027	1.40565	2.54935
		1.05987	1.58731	1.23345	2.22652	1.49124	1.6536	1.01206	1.86633	2.729	2.3011	1.42893	2.38584
	Biological triplicate 8 - technical triplicate	1.2413	2.24021	1.30542	2.13233	1.70209	3.26818	1.09397	2.29165	2.69506	2.34805	1.25459	1.6932
		0.976609	2.75676	1.44172	2.34386	2.41552	2.85681	1.16744	2.4764	2.33945	2.22631	2.01067	2.2482
		0.782094	2.93913	1.20321	2.43393	2.12574	2.86247	1.71062	2.69178	2.51372	2.49976	1.81083	2.00041
	Biological triplicate 9 - technical triplicate	0.890357	2.3367	1.39386	1.76061					2.07038	2.52635	0.936492	1.38483
		1.2658	2.10012	0.761431	2.15492					2.09156	2.15155	0.84499	1.79471
		0.843847	1.9047	0.958833	1.89638					2.22741	2.55477	0.851136	1.48083
	Biological triplicate 10 - technical triplicate	1.17353	2.13151	1.12788	1.93813					2.24405	1.46213	1.8819	1.79333
		1.0538	2.40696	1.29451	2.4266					1.87434	1.89717	1.0736	1.8711
		0.772673	2.23569	1.13875	2.50013					2.34655	1.80264	1.5356	2.12878
	non-parametric multiple comparison Steel's test with hTpoR WT No cytokine as control; p:	/		0.0179		<0.0001		0.0025		<0.0001		0.0806
	non-parametric multiple comparison Steel's test with hTpoR S505N No cytokine as control; p:					/		0.0015
	non-parametric multiple comparison Steel's test with hTpoR W515K No cytokine as control; p:									/		<0.0001
	Biological replicates	4
	Technical replicates	3x4
	Kruskal-Wallis test
	P value	<0,0001
	Exact or approximate P value?	Approximate
	P value summary	****
	Do the medians vary signif. (P < 0.05)?	Yes
	Number of groups	4
	Kruskal-Wallis statistic	43.69
	Data summary
	Number of treatments (columns)	4
	Number of values (total)	83
						Figure 5g: scatter plot, mean with SEM
