# Supplementary material for: Constitutive activation and oncogenicity are mediated by loss of helical structure at the cytosolic boundary of thrombopoietin receptor mutant dimers
Source: eLife. 2023 Jun 20;12:e81521. doi: 10.7554/eLife.81521 (PMC10313314; doi:10.7554/eLife.81521)
Supplement: Figure 6—source data 1. — JAK2 wild type (WT) dimerization induced by the murine thrombopoietin receptor (mTpoR) WT or mutant assessed in HEK-293T cells by split Gaussia-luciferase. [file elife-81521-fig6-data1.xlsx]

## Sheet: Figure 6e
	Figure 6 – Source Data 1: Raw data, scatter plot and statistics (Prism 9.1.2, jmp pro12) for Figure 6e. JAK2 wild type (WT) dimerization induced by the murine thrombopoietin receptor (mTpoR) WT or mutant assessed in HEK-293T cells by split Gaussia-luciferase.
		Normalized results on mTpoR WT of relative luciferase units (rlu)
		mTpoR WT	mTpoR V494N	mTpoR S498N	mTpoR G502N
	Biological triplicate 1 - technical triplicate	0.743449	1.03447	0.72273	2.63703
		0.983031	0.930989	0.790402	2.86822
		1.15097	1.4859	0.85644	3.5156
	Biological triplicate 2 - technical triplicate	0.74781	0.792951	1.28899	6.26319
		1.08633	3.17875	0.943328	5.45833
		1.28841	1.78625	2.06499	5.26926
	Biological triplicate 3 - technical triplicate	1.65432	0.452349	0.993814	3.72202
		0.73288	0.437687	0.594491	2.576
		0.612801	1.15183	0.640103	2.4359
	Biological triplicate 4 - technical triplicate	0.924491	0.564546	0.637392	1.56239
		1.16092	1.24142	1.54191	1.76275
		0.914591	1.53136	1.40174	1.71283
	Biological triplicate 5 - technical triplicate	0.319943	1.32432	1.35213	2.85213
		1.50107	3.41849	2.5861	3.94468
		1.17899	2.83972	2.54998	4.5806
	Biological triplicate 6 - technical triplicate	0.644165	1.66554	1.90995	3.34263
		1.28155	1.23584	1.30516	3.36648
		1.07429	1.53659	1.67246	2.61059
	Biological triplicate 7 - technical triplicate	1.43963	1.64381	1.82063	3.31802
		1.29239	1.47658	1.4572	3.21608
		1.62748	1.94272	2.41666	4.7596
	Biological triplicate 8 - technical triplicate	0.829693	1.18941	4.46177	1.05286
		1.15996	1.97301	1.47296	1.81552
		1.01034	1.28704	2.21566	2.08634
									Figure 6e: scatter plot, mean with SEM
	non-parametric multiple comparison Steel's test with mTpoR WT as control; p:	/	0.0350	0.0597	<0.0001
	Biological replicates	8
	Technical replicates	3x8
	Kruskal-Wallis test
	P value	<0,0001
	Exact or approximate P value?	Approximate
	P value summary	****
	Do the medians vary signif. (P < 0.05)?	Yes
	Number of groups	4
	Kruskal-Wallis statistic	42.16
	Data summary
	Number of treatments (columns)	4
	Number of values (total)	96
