# Supplementary material for: Constitutive activation and oncogenicity are mediated by loss of helical structure at the cytosolic boundary of thrombopoietin receptor mutant dimers
Source: eLife. 2023 Jun 20;12:e81521. doi: 10.7554/eLife.81521 (PMC10313314; doi:10.7554/eLife.81521)
Supplement: Figure 6—source data 2. — JAK2 wild type (WT) dimerization induced by the murine thrombopoietin receptor (mTpoR) WT or mutant assessed in HEK-293T cells by split Gaussia-luciferase. [file elife-81521-fig6-data2.xlsx]

## Sheet: Figure 6f
	Figure 6 – Source Data 2: Raw data, scatter plot and statistics (Prism 9.1.2, jmp pro12) for Figure 6f. JAK2 wild type (WT) dimerization induced by the murine thrombopoietin receptor (mTpoR) WT or mutant assessed in HEK-293T cells by split Gaussia-luciferase.
		Normalized results on mTpoR WT of relative luciferase units (rlu)
		mTpoR A499N	mTpoR A499N+2A	mTpoR W508K	mTpoR W508K+2A
	Biological triplicate 1 - technical triplicate	0.474878	0.787357	0.944839	0.381097
		0.815488	1.04744	1.73854	0.458021
		1.07328	2.33746	1.85252	0.549766
	Biological triplicate 2 - technical triplicate	0.524718	1.54042	1.46276	2.95262
		0.761712	2.16583	1.93696	0.675863
		0.344439	2.93403	3.52329	0.483042
	Biological triplicate 3 - technical triplicate	0.464656	0.675473	1.076	0.49318
		0.804378	0.636719	1.32226	0.146583
		0.510223	1.51382	2.21636	0.154645
	Biological triplicate 4 - technical triplicate	0.468809	0.845406	0.815243	0.738679
		1.09651	0.789786	1.57191	0.140332
		0.722185	1.00295	1.57307	0.179421
	Biological triplicate 5 - technical triplicate	1.63316	2.22779	0.996032	0.562696
		1.3725	2.13959	2.50195	0.389074
		1.24422	2.33158	1.82418	0.465153
	Biological triplicate 6 - technical triplicate	0.828973	3.46556	1.50632	0.52788
		1.1319	3.83623	1.55908	1.12519
		1.32771	3.39354	1.46836	0.800217
	Biological triplicate 7 - technical triplicate	1.27777	3.54989	1.95427	0.640628
		1.39577	4.29381	2.25556	0.972433
		0.427956	0.686594	2.42077	0.607403
	Biological triplicate 8 - technical triplicate	0.399292	0.78572	1.60386	0.351715
		1.57141	1.1417	1.56553	0.156754
				3.57923				Figure 6f: scatter plot, mean with SEM
	non-parametric multiple comparison Steel's test with mTpoR A499N as control; p:	/	0.0064
	non-parametric multiple comparison Steel's test with mTpoR W508K as control; p:			/	<0.0001
	Biological replicates	8
	Technical replicates	3x8
	Kruskal-Wallis test
	P value	<0,0001
	Exact or approximate P value?	Approximate
	P value summary	****
	Do the medians vary signif. (P < 0.05)?	Yes
	Number of groups	4
	Kruskal-Wallis statistic	44.29
	Data summary
	Number of treatments (columns)	4
	Number of values (total)	93
