# Supplementary material for: Constitutive activation and oncogenicity are mediated by loss of helical structure at the cytosolic boundary of thrombopoietin receptor mutant dimers
Source: eLife. 2023 Jun 20;12:e81521. doi: 10.7554/eLife.81521 (PMC10313314; doi:10.7554/eLife.81521)
Supplement: Figure 6—source data 3. — Kinase dead JAK2 K882D dimerization induced by the murine thrombopoietin receptor (mTpoR) wild type (WT) or mutant assessed in HEK-293T cells by split Gaussia-luciferase. [file elife-81521-fig6-data3.xlsx]

## Sheet: Supplement to Fig6
	Figure 6 – Source Data 3: Raw data, scatter plot and statistics (Prism 9.1.2, jmp pro12) for Figure 6f. Kinase dead JAK2 K882D dimerization induced by the murine thrombopoietin receptor (mTpoR) wild type (WT) or mutant assessed in HEK-293T cells by split Gaussia-luciferase.
		Normalized results on mTpoR WT of relative luciferase units (rlu)
		TpoR wt	TpoR V494N	TpoR S498N	TpoR G502N	TpoR A499N	TpoR A499N + 2A	TpoR W508K	TpoR W508K+2A
	Biological triplicate 1 - technical triplicate	0.329938	0.309465	0.626685	1.05022	0.353212	0.697289	0.442542	0.0924082
		0.650088	0.698418	1.07803	1.21367	0.895429	1.074	1.06166	0.171355
		0.798597	0.815718	1.32037	1.50671	0.836739	1.39889	1.44402	0.248536
	Biological triplicate 2 - technical triplicate	1.19454	1.08718	1.81386	1.90676	1.41857	0.863804	1.66495	0.552438
		1.49751	1.25077	2.12704	2.14222	1.68044	1.41192	1.83319	0.357744
		1.52932	1.78331	2.36558	2.3279	1.58984	1.67795	2.74118	0.580881
	Biological triplicate 3 - technical triplicate	0.917761	0.314795	0.657423	0.810209	0.464624	0.484749		0.170751
		0.742958	0.636492	0.819134	0.927736	0.711756	0.647953	1.54056	0.236031
		0.769367	1.38835	1.14543	1.91739	0.989497	0.955954	2.17858	0.271684
	Biological triplicate 4 - technical triplicate	0.996077	1.06464	1.18214	1.12319	0.855572	0.717063	1.2678	0.245584
		1.3896	1.13824	1.27378	1.66871	0.779135	0.838837	1.2948	0.31875
		1.18424	1.35034	1.22171	1.27169	0.700934	1.0786	1.82762	0.437846
	Biological triplicate 5 - technical triplicate	0.967427	0.880047	1.28241		1.03146	0.538086	1.21879
		1.1763	1.29734	1.22899	1.50846	0.738341	0.841191	1.33653	0.257974
		0.85627	1.71853	1.42421	1.38168	1.09024	0.990284	1.83139	0.299396
	non-parametric multiple comparison Steel's test with mTpoR WT as control; p:	/			0.0324			0.0128	<0.0001
	non-parametric multiple comparison Steel's test with mTpoR A499N as control; p:					/	1.0000
	Biological replicates	5
	Technical replicates	3x5											Supplement to Fig.6: scatter plot, mean with SEM
	Kruskal-Wallis test
	P value	<0,0001
	Exact or approximate P value?	Approximate
	P value summary	****
	Do the medians vary signif. (P < 0.05)?	Yes
	Number of groups	8
	Kruskal-Wallis statistic	53.2
	Data summary
	Number of treatments (columns)	8
	Number of values (total)	117
