# Supplementary material for: Constitutive activation and oncogenicity are mediated by loss of helical structure at the cytosolic boundary of thrombopoietin receptor mutant dimers
Source: eLife. 2023 Jun 20;12:e81521. doi: 10.7554/eLife.81521 (PMC10313314; doi:10.7554/eLife.81521)
Supplement: Supplementary file 1. — List of plasmids used throughout the experiments and primers used for various mutagenesis. [file elife-81521-supp1.xlsx]

## Sheet: plasmid+primers DNA sequences
	Sequences of the plasmids used throughout the study
	pMX-IRES-GFP containing HA-tagged human TpoR with murine EpoR signal sequence (as described in Staerk J, Lacout C, Sato T, et al. An amphipathic motif at the transmembrane-cytoplasmic junction prevents autonomous activation of the thrombopoietin receptor. Blood. 2006 Mar;107(5):1864-1871. DOI: 10.1182/blood-2005-06-2600. PMID: 16249382; PMCID: PMC1379661.
		5'-CTGCATAATGAAAGACCCCACCTGTAGGTTTGGCAAGCTAGCTTAAGTAACGCCATTTTGCAAGGCATGGAAAAATACATAACTGAGAATAGAAAAGTTCAGATCAAGGTCAGGAACAGATGGAACAGCTGAATATGGGCCAAAGCGGATATCTGTGGTAAGCAGTTCCTGCCCCGGCTCAGGGCCAAGAACAGATGGAACAGCTGAATATGGGCCAAACAGGATATCTGTGGTAAGCAGTTCCTGCCCCGGCTCAGGGCCAAGAACAGATGGTCCCCAGATGCGGTCCAGCCCTCAGCAGTTTCTAGAGAACCATCAGATGTTTCCAGGGTGCCCCAAGGACCTGAAATGACCCTGTGCCTTATTTGAACTAACCAATCAGTTCGCTTCTCGCTT…
	HA-tagged murine TpoR with murine EpoR signal sequence
		5'-ATGGACAAACTCAGGGTGCCCCTCTGGCCTCGGGTAGGCCCCCTCTGTCTCCTACTTGCTGGGGCAGCCTGGGCACCTTCACCCAGCCTCTACCCATACGACGTCCCAGACTACGCCCAAGATGTCTTCTTGCTGGCCTTGGGCACAGAGCCCCTGAACTGCTTCTCCCAAACATTTGAGGACCTCACCTGCTTCTGGGATGAGGAAGAGGCAGCACCCAGTGGGACATACCAGCTGCTGTATGCCTACCGAGGAGAGAAGCCCCGTGCATGCCCCCTGTATTCCCAGAGTGTGCCCACCTTTGGAACCCGGTATGTGTGCCAGTTTCCAGCCCAGGATGAAGTGCGCCTCTTCTTTCCGCTGCACCTCTGGGTGAAGAATGTGTCCCTCAACCAG…
	Primers used for mutagenesis
	murine TpoR
	L491N fwd	5'-CTTGGTGACTGCTCTGAACCTGGTGCTGAGCCTC-3'
	L491N rev	5'-GAGGCTCAGCACCAGGTTCAGAGCAGTCACCAAG-3'
	L492N fwd	5'-TTGGTGACTGCTCTGAACCTGGTGCTGAGCCTCAGT-3'
	L492N rev	5'-ACTGAGGCTCAGCACCAGGTTCAGAGCAGTCACCAA-3'
	L493N fwd	5'-TTGGTGACTGCTCTGCTCAATGTGCTGAGCCTCAGTGCC-3'
	L493N rev	5'-GGCACTGAGGCTCAGCACATTGAGCAGAGCAGTCACCAA-3'
	V494N fwd	5'-ACTGCTCTGCTCCTGAATCTGAGCCTCAGTGCCCTTCTG-3'
	V494N rev	5'-CAGAAGGGCACTGAGGCTCAGATTCAGGAGCAGAGCAGT-3'
	L495N fwd	5'-ACTGCTCTGCTCCTGGTGAATAGCCTCAGTGCCCTTCTG-3'
	L495N rev	5'-CAGAAGGGCACTGAGGCTATTCACCAGGAGCAGAGCAGT-3'
	S496N fwd	5'-GCTCTGCTCCTGGTGCTGAATCTCAGTGCCC-3'
	S496N rev	5'-GCCCAGAAGGGCACTGAGATTCAGCACCAGGAGCAGAGC-3'
	L497N fwd	5'-CTGCTCCTGGTGCTGAGCAATAGTGCCCTTCTGGGCCTACTG-3'
	L497N rev	5'-CAGTAGGCCCAGAAGGGCACTATTGCTCAGCACCAGGAGCAG-3'
	S498N fwd	5'-CTCCTGGTGCTGAGCCTCAATGCCCTTCTGGGCCTACTGCTG-3'
	S498N rev	5'-CAGCAGTAGGCCCAGAAGGGCATTGAGGCTCAGCACCAGGAG-3'
	A499N fwd	5'-CTGGTGCTGAGCCTCAGTAATCTTCTGGGCCTACTGGGC-3'
	A499N rev	5'-GCCCAGTAGGCCCAGAAGATTACTGAGGCTCAGCACCAG-3'
	L500N fwd	5'-GTGCTGAGCCTCAGTGCCAATCTGGGCCTAC-3'
	L500N rev	5'-TAGCAGCAGTAGGCCCAGATTGGCACTGAGGCTCAGCAC-3'
	L501N fwd	5'-GTGCTGAGCCTCAGTGCCCTTAATGGCCTACTGCTGC-3'
	L501N rev	5'-GCAGCAGTAGGCCATTAAGGGCACTGAGGCTCAGCAC-3'
	G502N fwd	5'-GCCTCAGTGCCCTTCTGAACCTACTGCTGCTAAAGT-3'
	G502N rev	5'-ACTTTAGCAGCAGTAGGTTCAGAAGGGCACTGAGGC-3'
	mTpoR+2A fwd	5'-GGCCTACTGCTGCTAGCTGCCAAG-3'
	mTpoR+2A rev	5'-AGGAAATTGCCACTTGGCAGCTAG-3'
	Q509G/F510P fwd	5'-GTCTCCTGTAGTGCGCAGGAGGTCCCCACTTTAGCAGCAGTAGGC-3'
	Q509G/F510P rev	5'-GCCTACTGCTGCTAAAGTGGGGACCTCCTGCGCACTACAGGAGAC-3'
	F510G fwd	5'-CCTACTGCTGCTAAAGTGGCAAGGTCCTGCGCACTACA-3'
	F510G rev	5'-TGTAGTGCGCAGGACCTTGCCACTTTAGCAGCAGTAGG-3'
	A512G/H513P fwd	5'-AAGTGGCAATTTCCTGGGCCCTACAGGAGACTGAGG-3'
	A512G/H513P rev	5'-CCTCAGTCTCCTGTAGGGCCCAGGAAATTGCCACTT-3'
	H513G/Y514P fwd	5'-CTAAAGTGGCAATTTCCTGCGGGCCCCAGGAGACTGAGGCATGCTTT-3'
	H513G/Y514P rev	5'-AAAGCATGCCTCAGTCTCCTGGGGCCCGCAGGAAATTGCCACTTTAG-3'
	R515G/R516P fwd	5'-GCGCACTACGGGCCACTGGGGGGTGC-3'
	R515G/R516P rev	5'-GCACCCCCCAGTGGCCCGTAGTGCGC-3'
	R515G/R516P/R518G/H519P fwd	5'-GGGCCACAAAGCAGGCCCCAGTGGCCCG-3'
	R515G/R516P/R518G/H519P rev	5'-CGGGCCACTGGGGCCTGCTTTGTGGCCC-3'
	R515A/R516A/R518A/H519A fwd	5'-GGGCCACAAAGCAGCCGCCAGTGCCGCG-3'
	R515A/R516A/R518A/H519A rev	5'-CGCGGCACTGGCGGCTGCTTTGTGGCCC-3'
	A512P fwd	5'-TGCTAAAGTGGCAATTTCCTCCGCACTACAGGAG-3'
	A512P rev	5'-CTCCTGTAGTGCGGAGGAAATTGCCACTTTAGCA-3'
	W508K fwd	5'-GGCCTACTGCTGCTAAAGAAGCAATTTCCTGCGCACT-3'
	W508K rev	5'-AGTGCGCAGGAAATTGCTTCTTTAGCAGCAGTAGGCC-3'
	G502N+2A fwd	5'-GCCTCAGTGCCCTTCTGAACCTACTGCTGCTAGCCGCCAAGTGGCAA-3'
	G502N+2A rev	5'-CGGAGTCACGGGAAGACTTGGATGACGACGATCGGCGGTTCACCGTT-3'
	human TpoR
	S505N fwd	5'-CTAGTGCTGGGCCTCAACGCCGTCCTGGGCCTG-3'
	S505N rev	5'-CAGGCCCAGGACGGCGTTGAGGCCCAGCACTAG-3'
	W515K fwd	5'-CTGCTGCTGCTGAGGAAGCAGTTTCCTGCACACTAC-3'
	W515K rev	5'--3'
	W515K+2A fwd	5'-AGGAAACTGCTTCCTCGCCGCCAGCAGCAGCAGGCCC-3'
	W515K+2A rev	5'-GGGCCTGCTGCTGCTGGCGGCGAGGAAGCAGTTTCCT-3'
	A519G/H520P fwd	5'-GGTGGCAGTTTCCTGGACCCTACAGGAGACTGAG-3'
	A519G/H520P rev	5'-CTCAGTCTCCTGTAGGGTCCAGGAAACTGCCACC-3'
	H520G/Y521P fwd	5'-GCATGCCTCAGTCTCCTGGGGCCTGCAGGAAACTGCCACCT-3'
	H520G/Y521P rev	5'-AGGTGGCAGTTTCCTGCAGGCCCCAGGAGACTGAGGCATGC-3'
	hTpoR+2A fwd	5'-GGGCCTGCTGCTGCTGGCGGCGAGGTGGCAGTTTCCT-3'
	hTpoR+2A rev	5'-AGGAAACTGCCACCTCGCCGCCAGCAGCAGCAGGCCC-3'
	w491A fwd	5'-TCACCAAGGAGATCGCGGCGGTCTCGGTGG-3'
	W491A rev	5'-CCACCGAGACCGCCGCGATCTCCTTGGTGA-3'
	human JAK2
		5'-GGCGCGCCGATCTTCAATATTGGCCATTAGCCATATTATTCATTGGTTATATAGCATAAATCAATATTGGCTATTGGCCATTGCATACGTTGTATCTATATCATAATATGTACATTTATATTGGCTCATGTCCAATATGACCGCCATGTTGGCATTGATTATTGACTAGTTATTAATAGTAATCAATTACGGGGTCATTAGTTCATAGCCCATATATGGAGTTCCGCGTTACATAACTTACGGTAAAGTTGGAACAAGAGTCCACTATAAAAGAACGTGGACTCCAACGTCAAAGGGCGAAAAACGTCTATCAGGGCGATGGCCCACTACGTGAACCATCACCCAAATCAAGTTTTTGGGGTCGAGGTGCCGTAAAGCACTAAATCGGAACCCTAA…
	K882D fwd	5'-CGAGGTGGTCGCTGTGGATAAACTCCAGCACAGCA-3'
	K882D rev	5'-TGCTGTGCTGGAGTTTATCCACAGCGACCACCTCG-3'
	(GGGGS)2-hGLuc(1)	5'-GGTGGCGGTGGCTCTGGAGGTGGTGGGTCCTCCGGAAAGCCCACCGAGAACAACGAAGACTTCAACATCGTGGCCGTGGCCAGCAACTTCGCGACCACGGATCTCGATGCTGACCGCGGGAAGTTGCCCGGCAAGAAGCTGCCGCTGGAGGTGCTCAAAGAGATGGAAGCCAATGCCCGGAAAGCTGGCTGCACCAGGGGCTGTCTGATCTGCCTGTCCCACATCAAGTGCACGCCCAAGATGAAGAAGTTCATCCCAGGACGCTGCCACACCTACGAAGGCGACAAAGAGTCCGCACAGGGCGGCATAGGC-3'
	(GGGGS)2-hGLuc(2)	5'-GGTGGCGGTGGCTCTGGAGGTGGTGGGTCCTCCGGAGAGGCGATCGTCGACATTCCTGAGATTCCTGGGTTCAAGGACTTGGAGCCCATGGAGCAGTTCATCGCACAGGTCGATCTGTGTGTGGACTGCACAACTGGCTGCCTCAAAGGGCTTGCCAACGTGCAGTGTTCTGACCTGCTCAAGAAGTGGCTGCCGCAACGCTGTGCGACCTTTGCCAGCAAGATCCAGGGCCAGGTGGACAAGATCAAGGGGGCCGGTGGTGAC-3'
