# Supplementary material for: Constitutive activation and oncogenicity are mediated by loss of helical structure at the cytosolic boundary of thrombopoietin receptor mutant dimers
Source: eLife. 2023 Jun 20;12:e81521. doi: 10.7554/eLife.81521 (PMC10313314; doi:10.7554/eLife.81521)
Supplement: Supplementary file 2. — List and origin of cells used throughout the in vitro experiments. [file elife-81521-supp2.xlsx]

## Sheet: cells
		species	strain			cell line source
2C4-gamma2A		human	fibrosarcoma	JAK2-deficient
HEK-293T		human	embryonic kidney			HEK293T were from the American Type Culture Collection (ATCC).
Ba/F3		murine	pro-B cells	interleukin-3 dependent		The Ba/F3 cell line were initially obtained in 1997 from Prof. Merton Bernfield, Harvard Medical School, Children's Hospital, Boston MA by the laboratory of Prof. Harvey Lodish at Whitehead Institute, MIT, Cambridge MA (Palacios and M. Steinmetz, Cell, Vol. 41, 1985, pp.727-734). The cells were then transferred to Ludwig Institute for Cancer Research, Brussels Branch in 2001.
All cell lines used in this study were negative for mycoplasma and regularly tested for mycoplasma contamination by polymerase chain reaction (PCR).
