# Supplementary material for: Constitutive activation and oncogenicity are mediated by loss of helical structure at the cytosolic boundary of thrombopoietin receptor mutant dimers
Source: eLife. 2023 Jun 20;12:e81521. doi: 10.7554/eLife.81521 (PMC10313314; doi:10.7554/eLife.81521)
Supplement: Supplementary file 3. — Details and ethics of mice used throughout the in vivo experiments. [file elife-81521-supp3.xlsx]

## Sheet: mouse experiments
	Mouse experiments - supplementary information
Species	mouse
Strain	C57BL/6
Age	6 to 8 weeks at reconstitution (sub-lethal irradiation and bone marrow transplantation)
Sex	female			Bleeding was performed 6 weeks after transplantation
Genetic modification	None
Supplier name	accredited ANCA platform, animal facility of the Université catholique de Louvain, LA2230397
	The ANCA platform follows the guidelines of the European Union (EU directive 2010/63/EU) and Belgian legislation (arrêté royal du 29 mai 2013) regarding animal housing, animal experimentation and mandatory training of users of the facility. All experimental procedures and protocols are reviewed and approved by the local Ethics Committee of Louvain-la-Neuve campus for UCLouvain (Belgium)
Sample size determination	number of donor mice	the number of recipient mice was calculated based on best practice and commonly used statistical tests in the field as 5 per condition i.e. : 5x (number of condition =4) x (biological replicates = 3) = 60
	number of recipient mice	the number of recipient mice was calculated based on best practice and commonly used statistical tests in the field as 5 per condition with an evaluated death-rate of 40% after reconstitution i.e. : 5x (number of condition =4) x (biological replicates = 3) x (survival = 60%) = 36
Ethical approval	This work was approved by the Ethics Committee for Animal Experimentation of the Université catholique de Louvain under the reference 2019/UCL/MD/026
	For this specific work in the field of cancer research, pain and discomfort of the animals was based on best practice and commonly used reference in the field : Workman P, Aboagye EO, Balkwill F, Balmain A, Bruder G, Chaplin DJ, Double JA, Everitt J, Farningham DA, Glennie MJ, Kelland LR, Robinson V, Stratford IJ, Tozer GM, Watson S, Wedge SR, Eccles SA; Committee of the National Cancer Research …
